# Supplementary material
Source: publisher figshare collection journal article supplement (https://acs.figshare.com/ndownloader/files/4701109)
Supplement: Supplementary file 1 [file 4701109]

## Supplementary Materials to the manuscript

### The Reaction of the $\text{Si}_8\text{O}_{20}(\text{SnMe}_3)_8$ Building Block with Silyl Chlorides: A New Synthetic Methodology for Preparing Nanostructured Building Block Solids

Jason C. Clark, Craig E. Barnes\*

Department of Chemistry, University of Tennessee, Knoxville, TN 37996-1600

Submitted to *Chemistry of Materials*

Table of Contents:

Figure S1

$^{29}\text{Si}$  Solid state NMR (SSNMR) spectra (MAS) of the product from the reaction of  $\text{HSiCl}_3$  with  $\text{Si}_8\text{O}_{20}(\text{SnMe}_3)_8$  in hexane with varying initial stoichiometries of  $\text{HSiCl}_3 : \text{Si}_8\text{O}_{20}(\text{SnMe}_3)_8$

Figure S2

$^{29}\text{Si}$  Solid state NMR (SSNMR) spectra (MAS) of the product from the reaction of  $\text{Me}_2\text{SiCl}_2$  with  $\text{Si}_8\text{O}_{20}(\text{SnMe}_3)_8$  in toluene with varying initial stoichiometries of  $\text{Me}_2\text{SiCl}_2 : \text{Si}_8\text{O}_{20}(\text{SnMe}_3)_8$

Figure S3

$^{29}\text{Si}$  Solid state NMR (SSNMR) spectra (MAS) of the product from the reaction of  $\text{Me}_2\text{SiCl}_2$  with  $\text{Si}_8\text{O}_{20}(\text{SnMe}_3)_8$  in hexane with varying initial stoichiometries of  $\text{Me}_2\text{SiCl}_2 : \text{Si}_8\text{O}_{20}(\text{SnMe}_3)_8$

Figure S4

BJH pore volume distribution for the reaction of  $\text{HSiCl}_3$  and  $\text{Si}_8\text{O}_{20}(\text{SnMe}_3)_8$  in toluene. This pore size distribution is typical of all the high surface area solids investigated in these studies.

Figure S5

$^{29}\text{Si}$  SSNMR (MAS and CPMAS) of a nanostructure solid containing only “embedded”  $\text{Me}_2\text{Si}(\text{OSi}\equiv)_2$  groups linking  $\text{Si}_8\text{O}_{20}$  building blocks.  $\text{SiCl}_4$ -derived linking groups are also present in the matrix.

Figure S6

$^{29}\text{Si}$  SSNMR (MAS and CPMAS) of a nanostructure solid containing only “surface”  $\text{Me}_2\text{SiCl}(\text{OSi}\equiv)$  groups linking  $\text{Si}_8\text{O}_{20}$  building blocks.  $\text{SiCl}_4$ -derived linking groups are also present in the matrix.

Table S1

BET Surface area analysis of the solids resulting from the reaction of  $\text{Me}_2\text{SiCl}_2$  with  $\text{Si}_8\text{O}_{20}(\text{SnMe}_3)_8$  under the conditions given. Absorption gas: nitrogen. Pore size distributions calculated using standard BJH equations.

Table S2

BET Surface area analysis of the solids resulting from the reaction of  $\text{HSiCl}_3$  with  $\text{Si}_3\text{O}_2\text{O}_{20}(\text{SnMe}_3)_8$  under the conditions given. Absorption gas: nitrogen. Pore size distributions calculated using standard BJH equations.

Figure S1

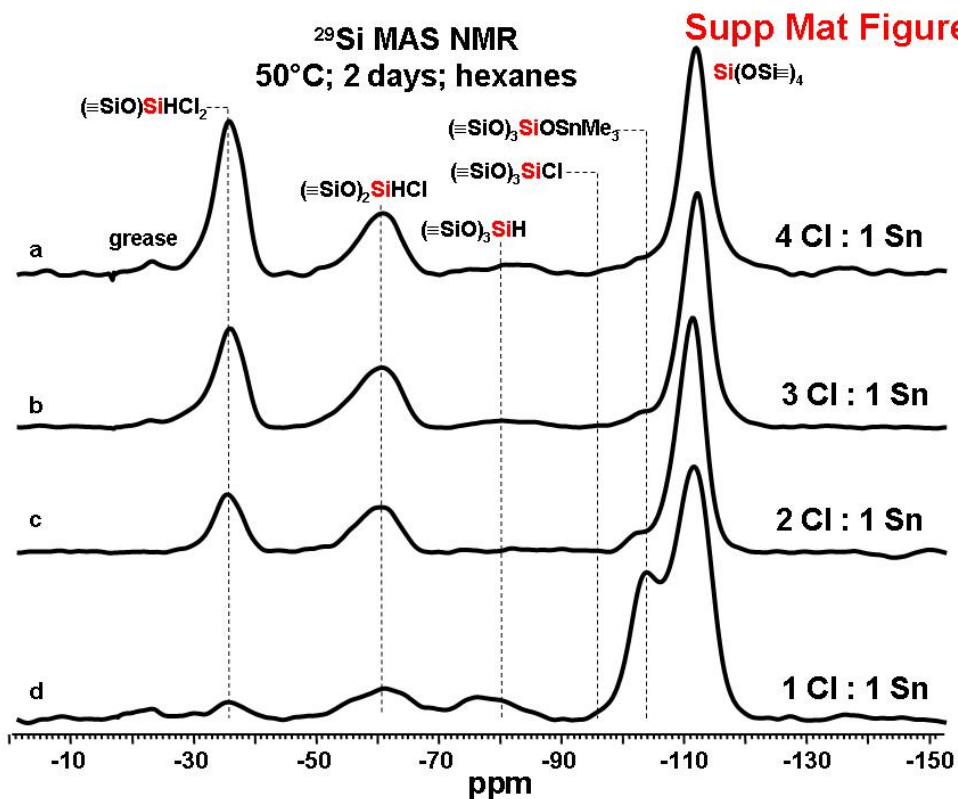

Figure S2

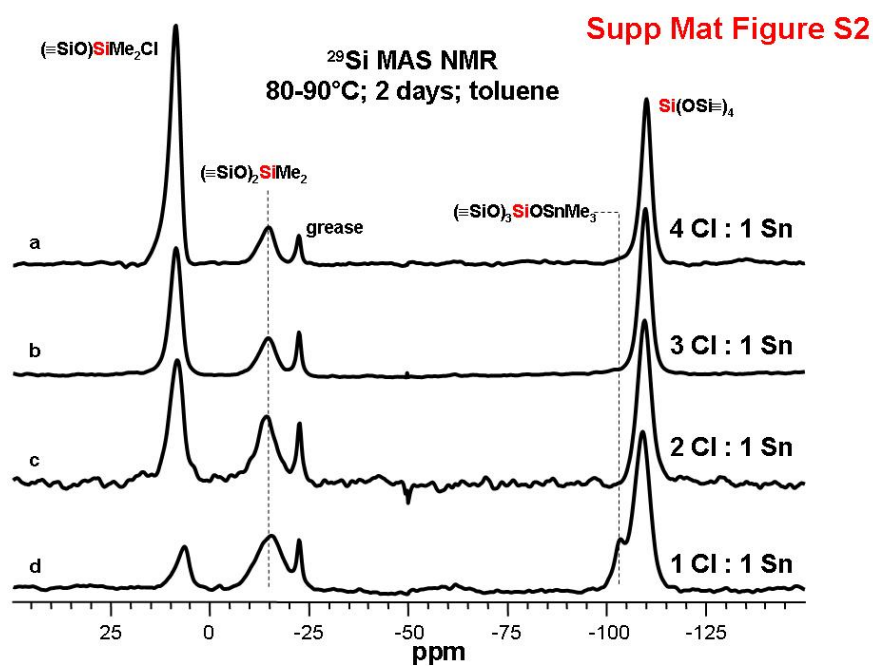

Figure S3

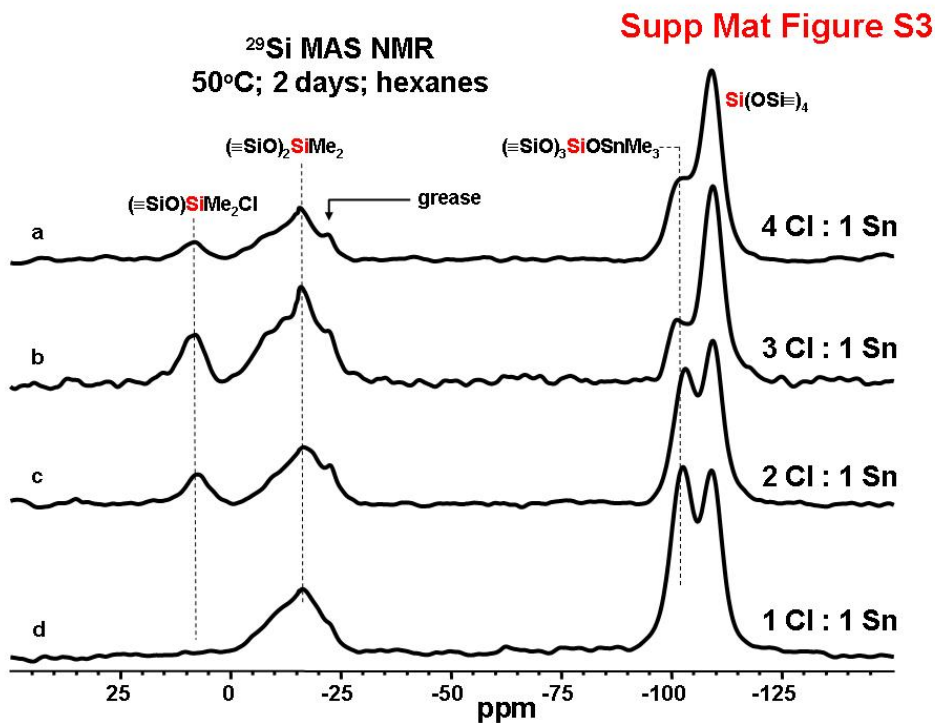

Figure S4

**Supp Mat Figure S4**

BJH pore volume distribution for the reaction of  $\text{HSiCl}_3$  and  $\text{Si}_8\text{O}_{20}(\text{SnMe}_3)_8$  in toluene  
Total surface area:  $672 \text{ m}^2/\text{g}$

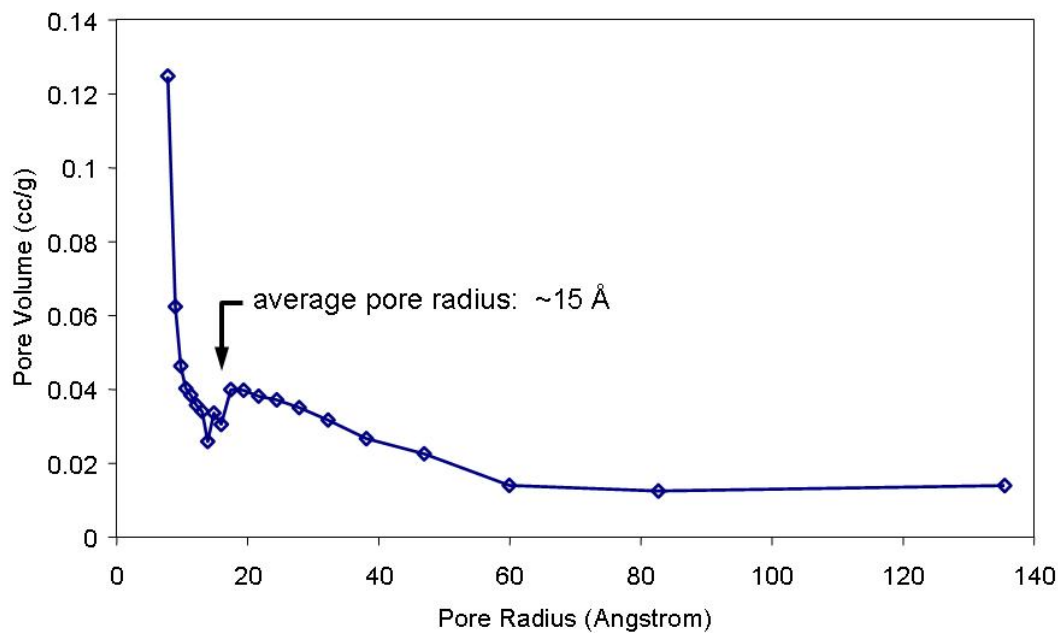

Figure S5

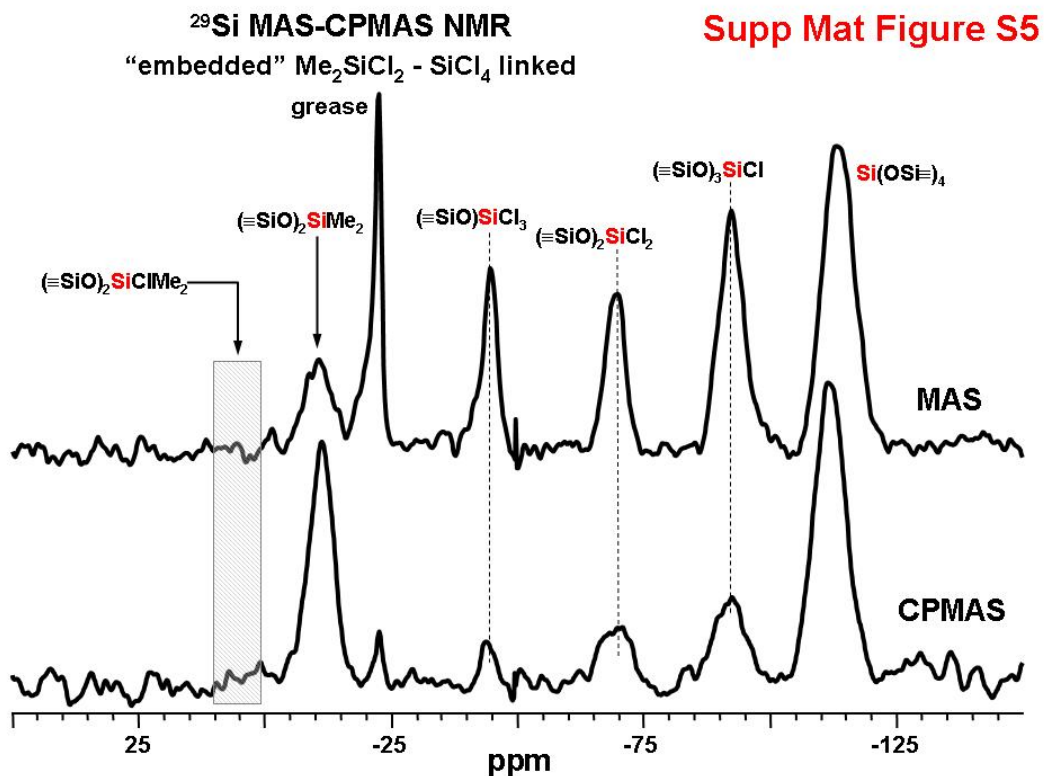

Figure S6

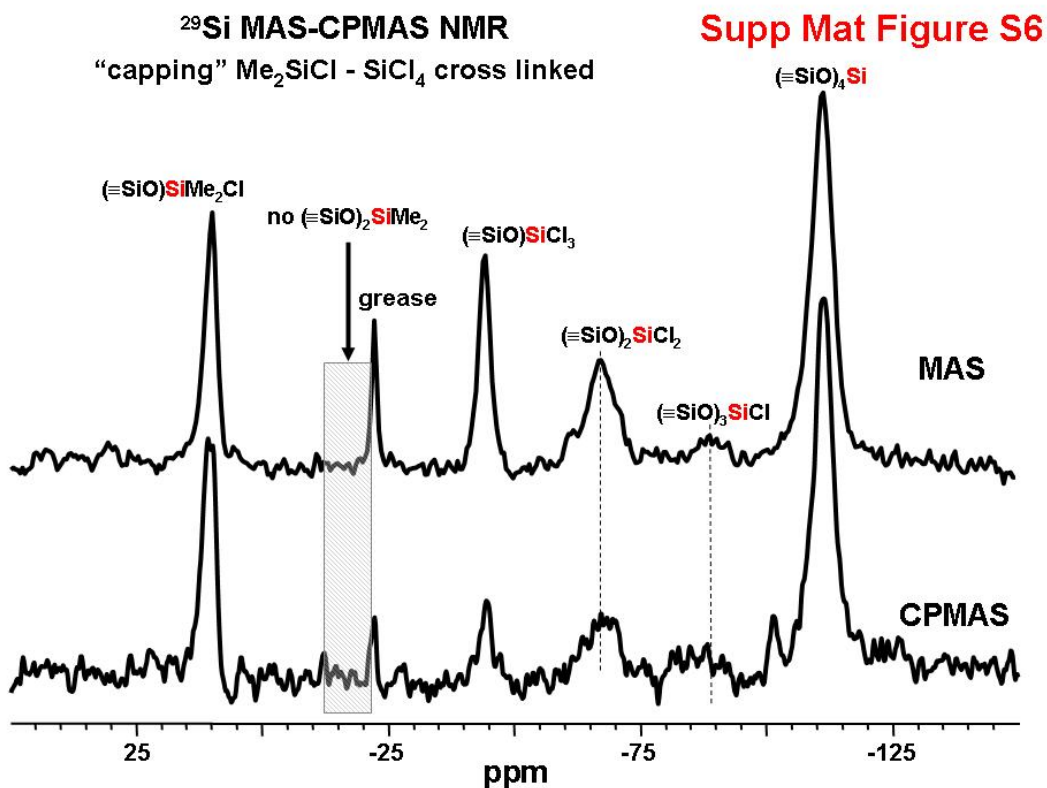

**Table S1****Supp Mat Table S1**

**Table S1** BET Surface area analysis of the solids resulting from the reaction of  $\text{Me}_2\text{SiCl}_2 + \text{Si}_8\text{O}_{20}(\text{SnMe}_3)_8$  under the conditions given. Absorption gas: nitrogen. Pore size distributions calculated using standard BJH equations.

| Conditions               | Cl:Sn | Surface Area (m <sup>2</sup> /g) | Total Pore Volume (cc/g) | Average Pore Radius (Å) |
|--------------------------|-------|----------------------------------|--------------------------|-------------------------|
| Toluene, 80-90°C, 2 days | 4:1   | low                              | low                      | low                     |
| Toluene, 80-90°C, 2 days | 3:1   | low                              | low                      | low                     |
| Toluene, 80-90°C, 2 days | 2:1   | 172                              | 0.150                    | 17                      |
| Toluene, 80-90°C, 2 days | 1:1   | 669                              | 0.496                    | 15                      |
| Hexanes, 50°C, overnight | 4:1   | 13                               | 0.015                    | 24                      |
| Hexanes, 50°C, overnight | 3:1   | 29                               | 0.171                    | 13                      |
| Hexanes, 50°C, overnight | 2:1   | 12                               | 0.010                    | 19                      |
| Hexanes, 50°C, overnight | 1:1   | 14                               | 0.021                    | 30                      |

**Table S2****Supp Mat Table S2**

**Table S2** BET Surface Area Analysis of the solids resulting from the reaction of  $\text{HSiCl}_3 + \text{Si}_8\text{O}_{20}(\text{SnMe}_3)_8$  under the conditions given. Absorption gas: nitrogen. Pore size distributions calculated using standard BJH equations.

| Conditions               | Cl:Sn | Surface Area (m <sup>2</sup> /g) | Total Pore Volume (cc/g) | Average Pore Radius (Å) |
|--------------------------|-------|----------------------------------|--------------------------|-------------------------|
| Toluene, 80-90°C, 2 days | 4:1   | low                              | low                      | low                     |
| Toluene, 80-90°C, 2 days | 3:1   | 558                              | 0.400                    | 14                      |
| Toluene, 80-90°C, 2 days | 2:1   | 660                              | 0.513                    | 16                      |
| Toluene, 80-90°C, 2 days | 1:1   | 672                              | 0.539                    | 16                      |
| Hexanes, 50°C, overnight | 4:1   | 336                              | 0.243                    | 14                      |
| Hexanes, 50°C, overnight | 3:1   | 324                              | 0.254                    | 16                      |
| Hexanes, 50°C, overnight | 2:1   | 401                              | 0.295                    | 15                      |
| Hexanes, 50°C, overnight | 1:1   | 58                               | 0.046                    | 16                      |
